# Supplementary material for: Salvage radiotherapy strategy and its prognostic significance for patients with locoregional recurrent cervical cancer after radical hysterectomy: a multicenter retrospective 10-year analysis
Source: Springer Nature journal article supplement (doi:10.1186/s12885-023-11406-z), 2023-09-26
Supplement: MOESM2 [file 26090286]

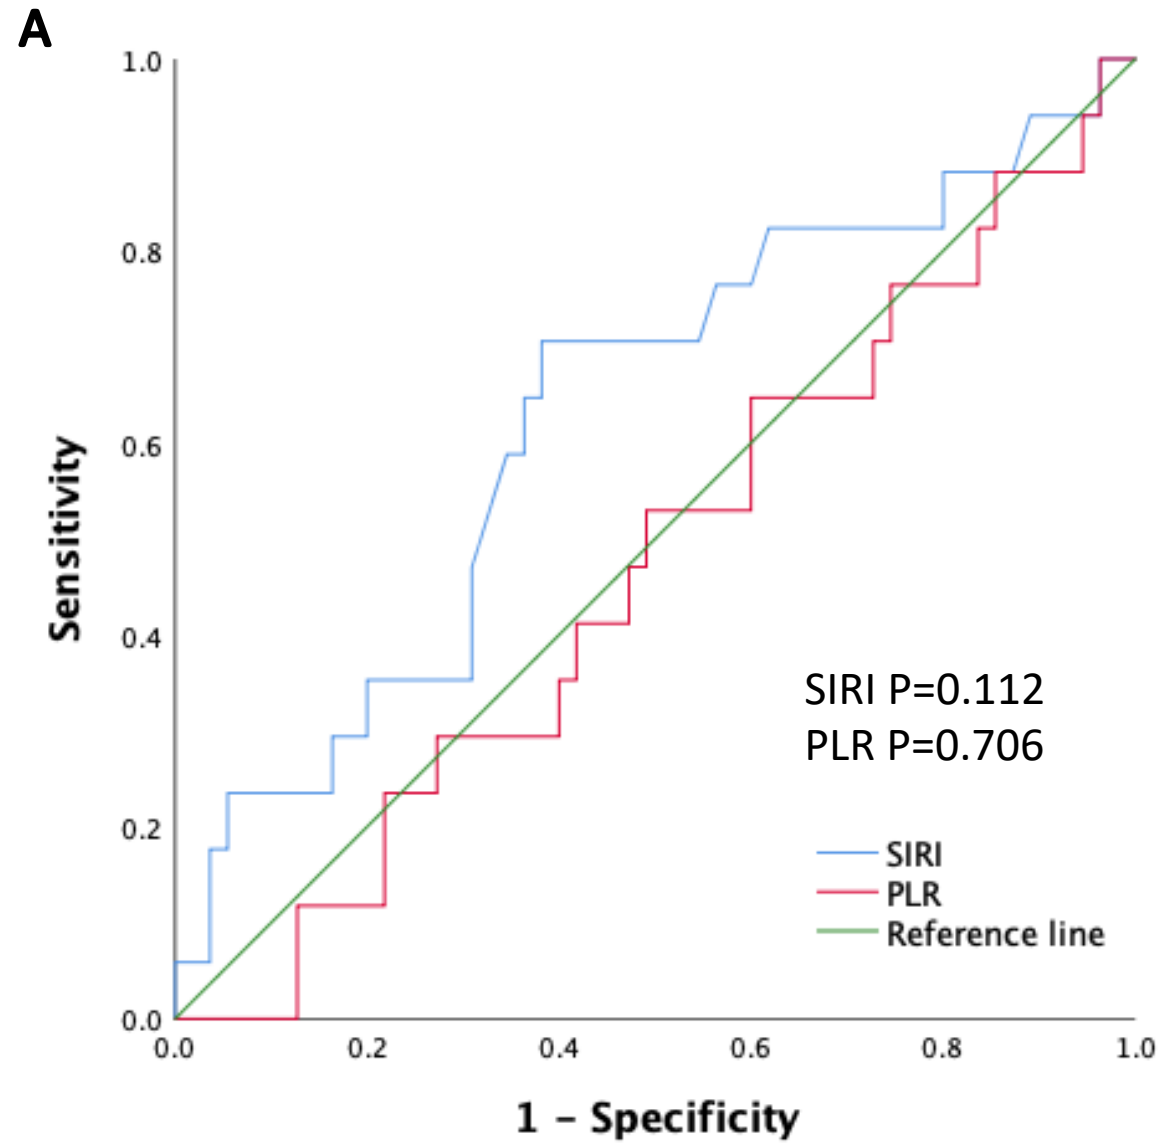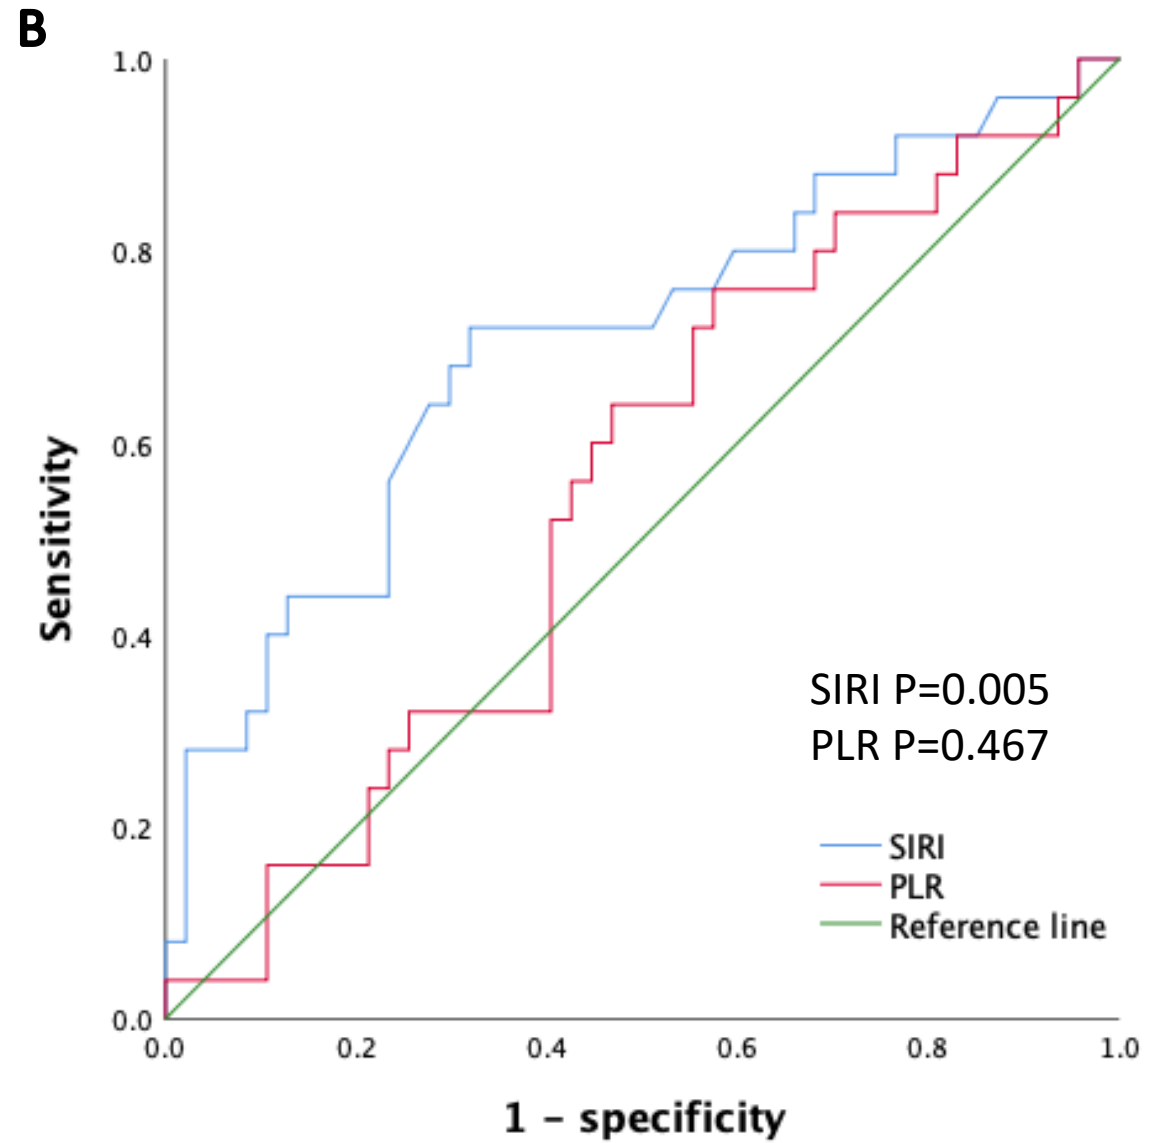

**Supplementary file 1:** The receiver operating characteristic (ROC) curves of SIRI and PLR based on (a) Overall survival and (b) progression-free survival.
